# Supplementary material for: Combinatorial CAR design improves target restriction
Source: PubMed Central journal article supplement (PMC7948400; doi:10.1074/jbc.ra120.016234), 2020-12-03
Supplement: mmc1.pdf [file mmc1.pdf]

## **Supporting Information**

### **Combinatorial CAR design improves target restriction**

Hakan Köksal<sup>1</sup>, Pierre Dillard<sup>1</sup>, Asta Juzeniene<sup>2</sup>, Gunnar Kvalheim<sup>1</sup>, Erlend B. Smeland<sup>3,4</sup>, June H. Myklebust<sup>3,4</sup>, Else Marit Inderberg<sup>1</sup>, Sébastien Wälchli<sup>1\*</sup>

<sup>1</sup>Department of Cellular Therapy, Department of Oncology, Oslo University Hospital, Oslo, Norway

<sup>2</sup>Department of Radiation Biology, Institute for Cancer Research, Oslo University Hospital, Oslo, Norway

<sup>3</sup>Department of Cancer Immunology, Institute for Cancer Research, Oslo University Hospital, Oslo, Norway

<sup>4</sup>K.G.Jebsen Centre for B cell malignancies, University of Oslo, Oslo, Norway

\*Corresponding author: Sébastien Wälchli, Department of Cellular Therapy, Department of Oncology, Oslo University Hospital, Oslo, Norway. E-mail: [sebastw@rr-research.no](mailto:sebastw@rr-research.no), Phone: +4722782314

### **List of Contents:**

#### **Supporting Figures S1-S8**

**A**

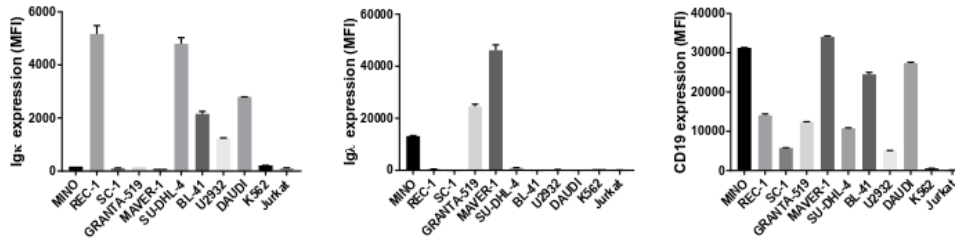

**B**

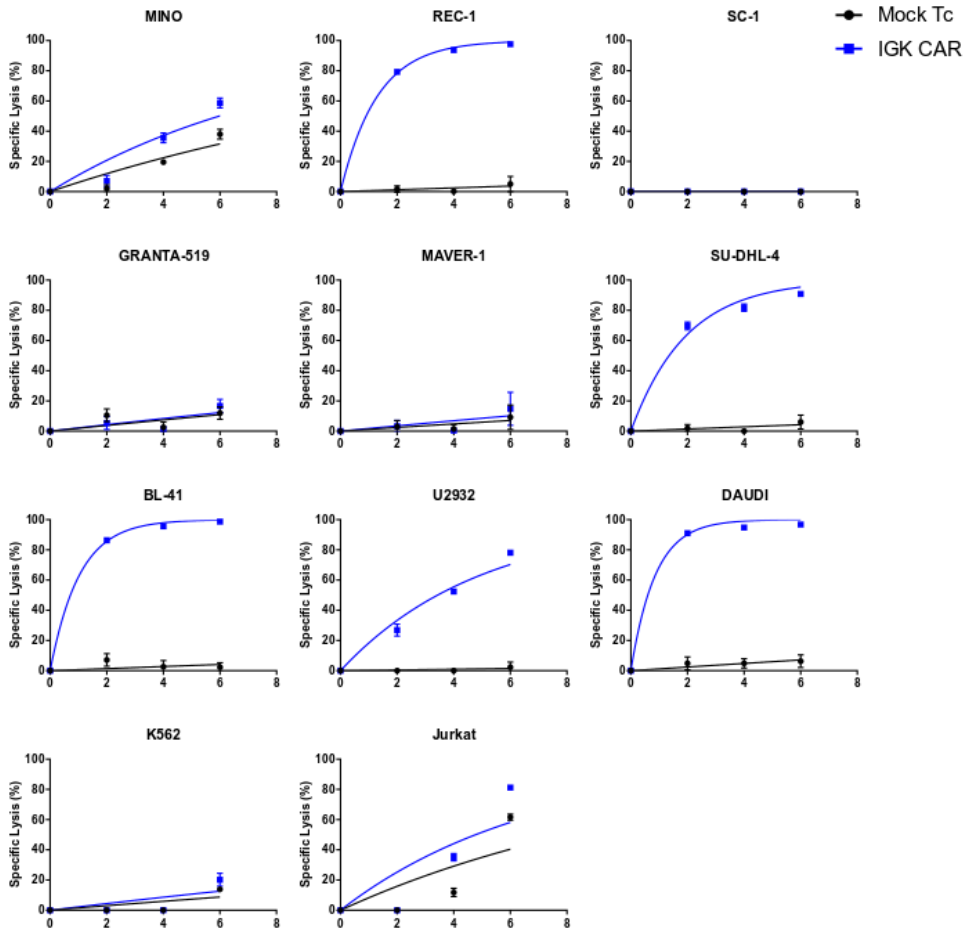

**Figure S1: IGK CAR-expressing T cells target and specifically eliminate Igκ+ target cells.** (A) Expression levels of Igκ, Igl light chains and CD19 receptor for each cell lines. Data represent mean ± S.D. of duplicates. (B) BLI assay performed by Mock T cells and IGK CAR electroporated T cells at an E:T ratio of 25:1 for 6 hours. Data represent mean ± S.D. of quadruplicates. Representative data from one of two independent experiments are shown.

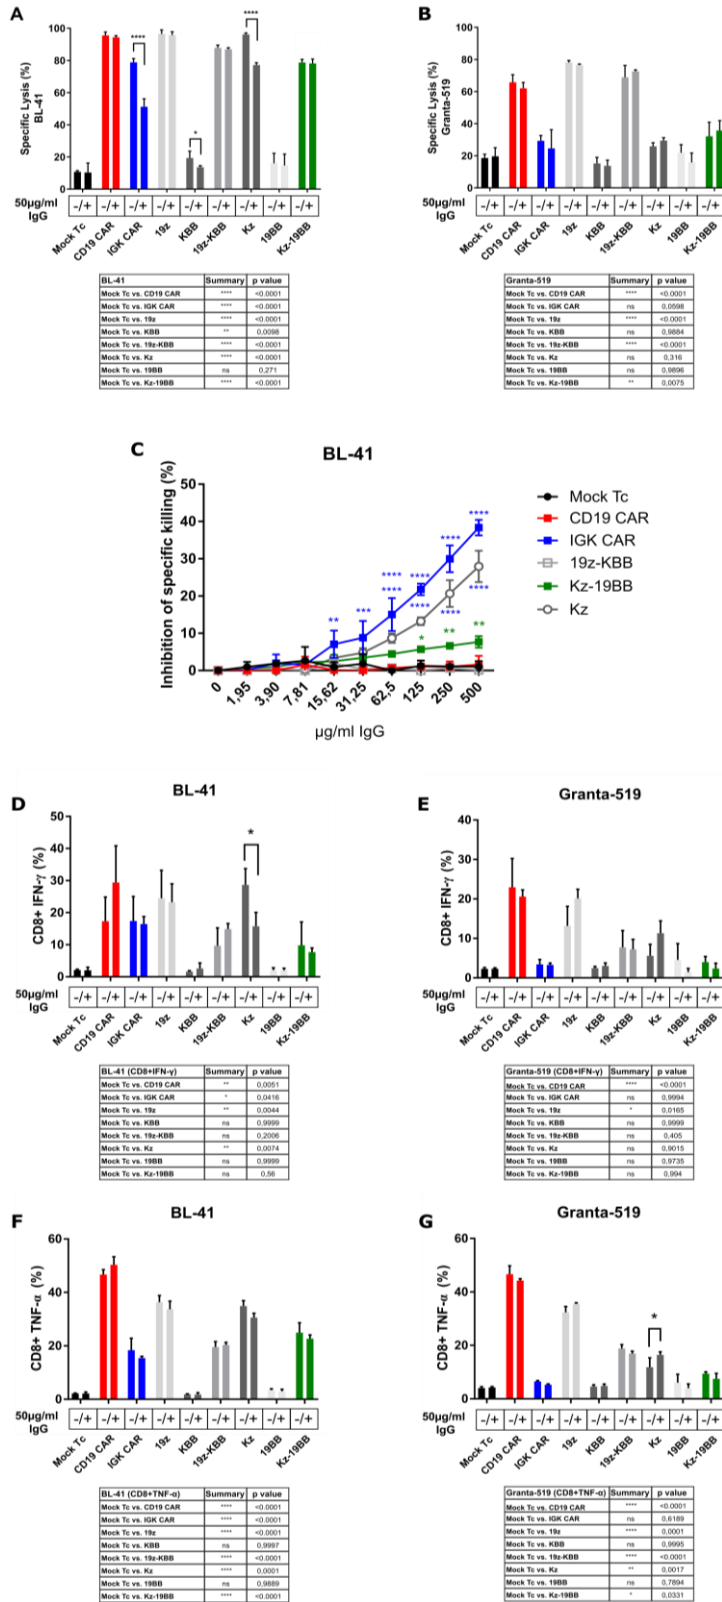

**Figure S2: Combinatorial CAR T cells are less sensitive to serum inhibition compared to individual components.** (A-B) BLI killing assay of Mock T cells and CAR construct electroporated T cells co-cultured with IgG<sup>+</sup> BL-41 or IgG<sup>-</sup> Granta-519 cell lines for 10 hours (10:1 E:T ratio) in the presence or absence of serum purified IgG (50µg/ml). Data represent mean ± S.D. of quadruplicates. Representative data from one of three independent experiments are shown. (C) BLI killing assay of Mock T cells and CAR construct electroporated T cells co-cultured with BL-41 cell line for 10 hours in presence of increasing concentration of IgG (10:1 E:T ratio). Specific lysis inhibition corresponds to the difference of cytotoxic capacity of each construct between IgG<sup>+</sup> and IgG<sup>-</sup> conditions. Data represent mean ± S.D. of triplicates. One-way ANOVA was performed between Mock T cell and other groups for each IgG concentration. (D-G) CD8<sup>+</sup> T-cell intracellular cytokine staining (IFN- $\gamma$  and TNF- $\alpha$ ) after co-cultivation with BL-41 or Granta-519 cell lines in the presence or absence of IgG at 50µg/ml (for 24 hours, 1:2 E:T ratio) Data represent mean ± S.D. of triplicates. Representative data from one of two independent experiments are shown. (A,B,D-G) Significance was assessed by Student t-test comparing IgG<sup>+</sup> and IgG<sup>-</sup> conditions and by one-way ANOVA between Mock T cells and any other group (IgG<sup>-</sup>). \* $P < 0.05$ , \*\* $P < 0.01$ , \*\*\* $P < 0.001$ , \*\*\*\* $P < 0.0001$ .

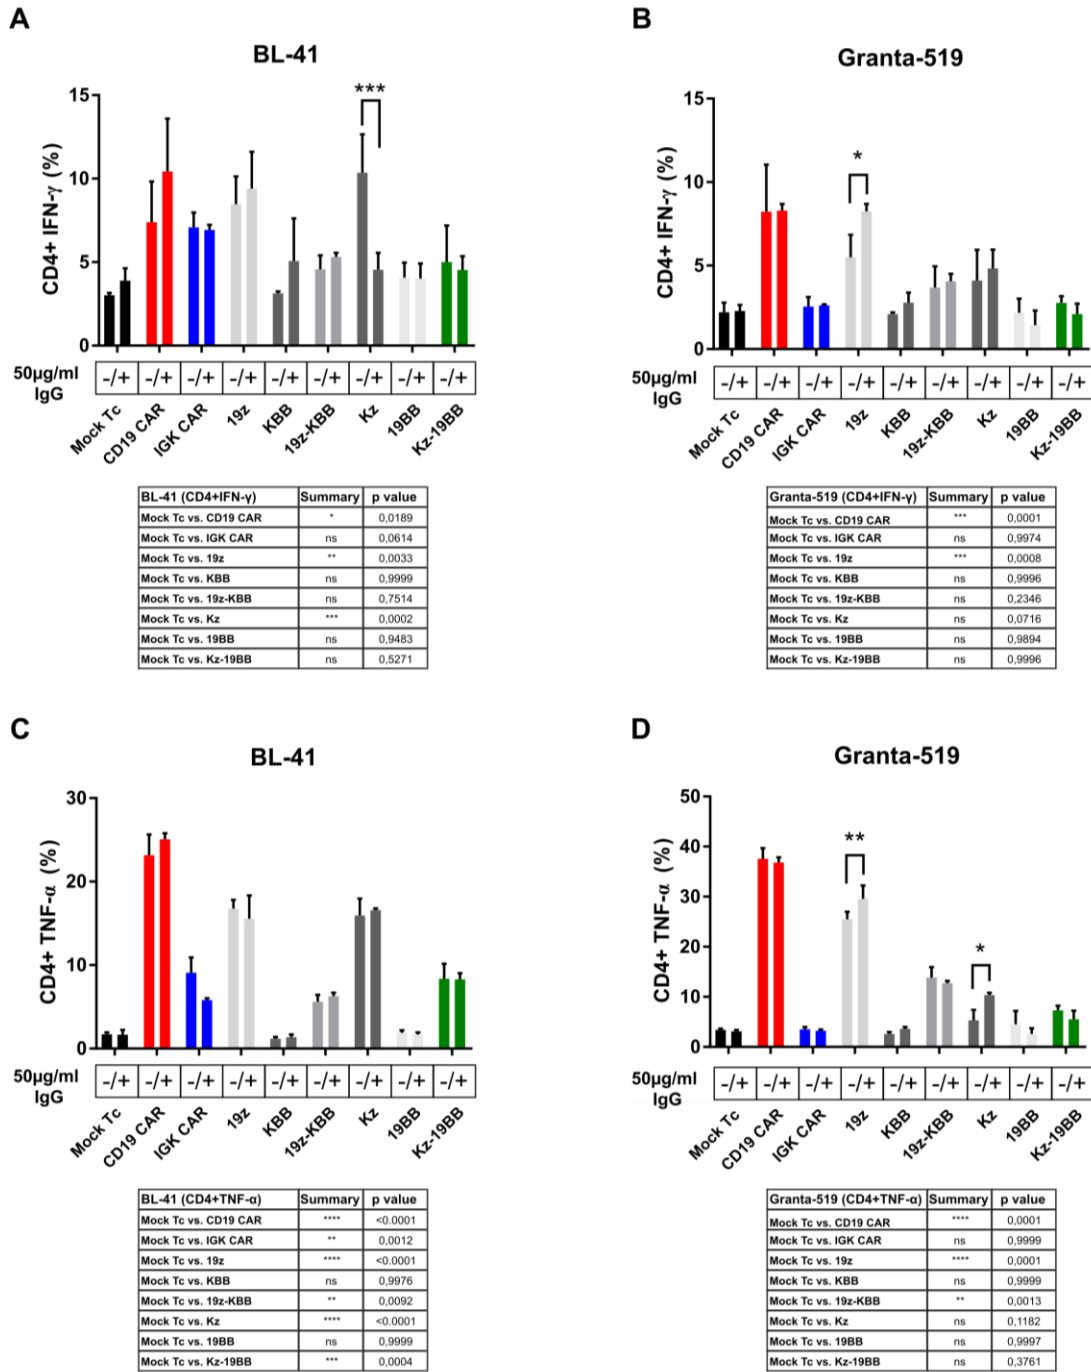

**Figure S3: Combinatorial CARs limit serum inhibition while preserving CD3 $\zeta$  driven specificity.** (A-D) CD4<sup>+</sup> T-cells intracellular cytokine staining (IFN- $\gamma$  and TNF- $\alpha$ ) after co-cultivation with BL-41 or Granta-519 cell lines in the presence or absence of IgG (50 $\mu$ g/ml) (for 24 hours, 1:2 E:T ratio) Data represent mean  $\pm$  S.D. of triplicates. Representative data from one of two independent experiments are shown.

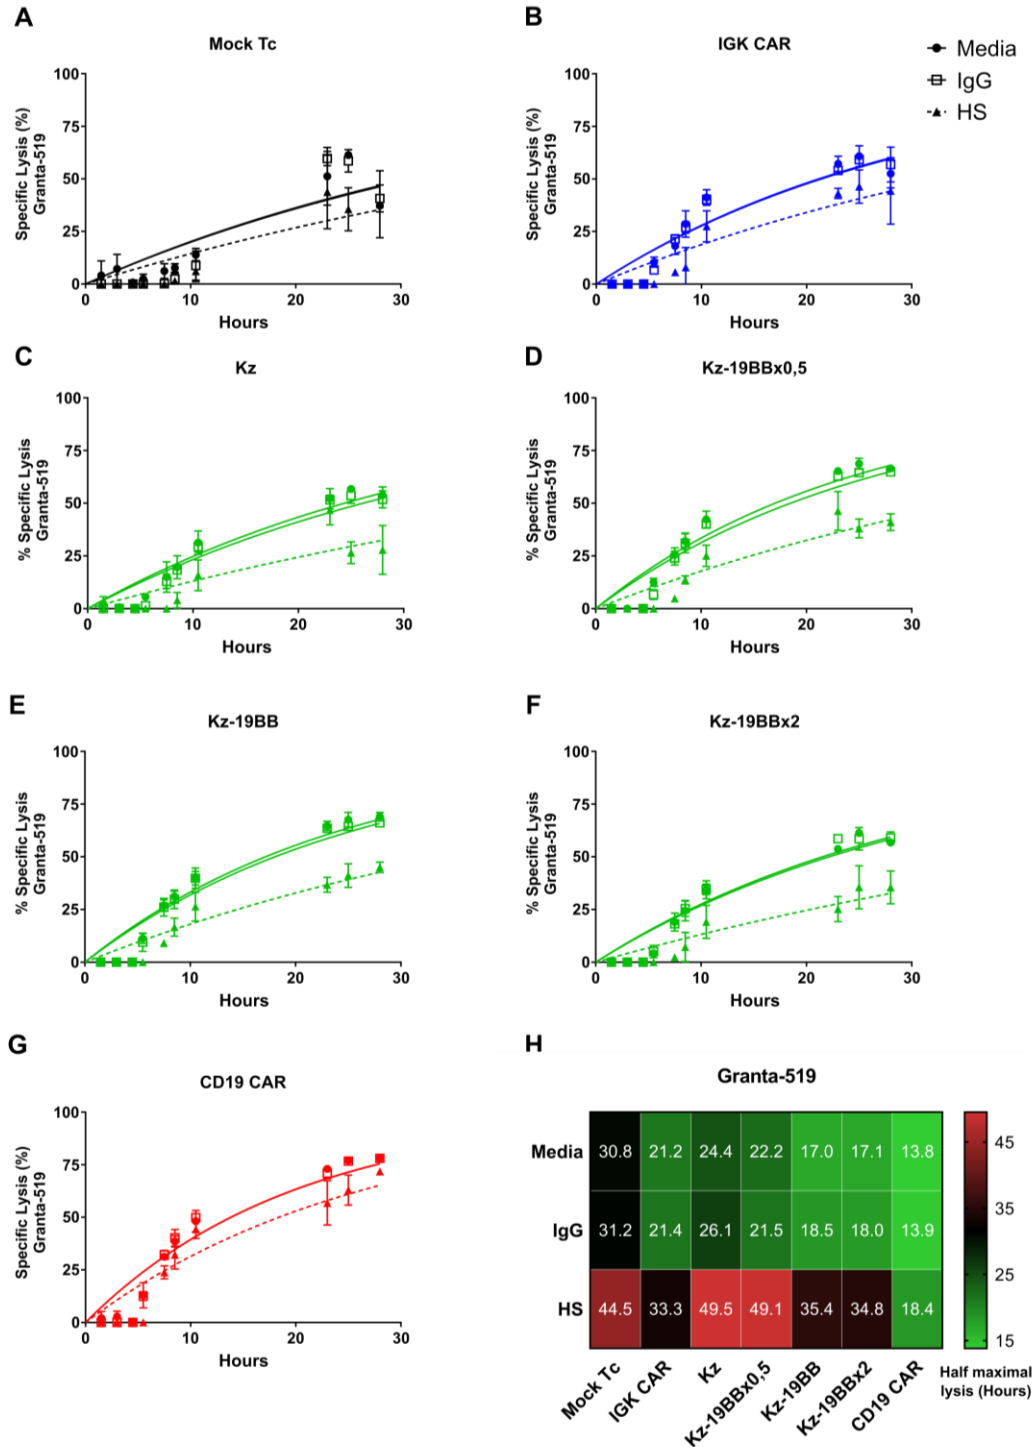

**Figure S4: Kz-19BB expressing T cells also target CD19+ cells with each increased concentration of 19BB part.** (A-G) BLI killing assay of Mock and CARs construct mRNA electroporated T cells co-cultured with Granta-519 cell lines either in presence or absence of IgG (50µg/ml) or 25% human serum. H) Heat maps of half maximal lysis values obtained via one phase exponential fitting against Granta-519. Data represent mean ± S.D. of quadruplicates. Representative data from one of three independent experiments are shown. \* $P < 0.05$ , \*\* $P < 0.01$ , \*\*\* $P < 0.001$ , \*\*\*\* $P < 0.0001$ .

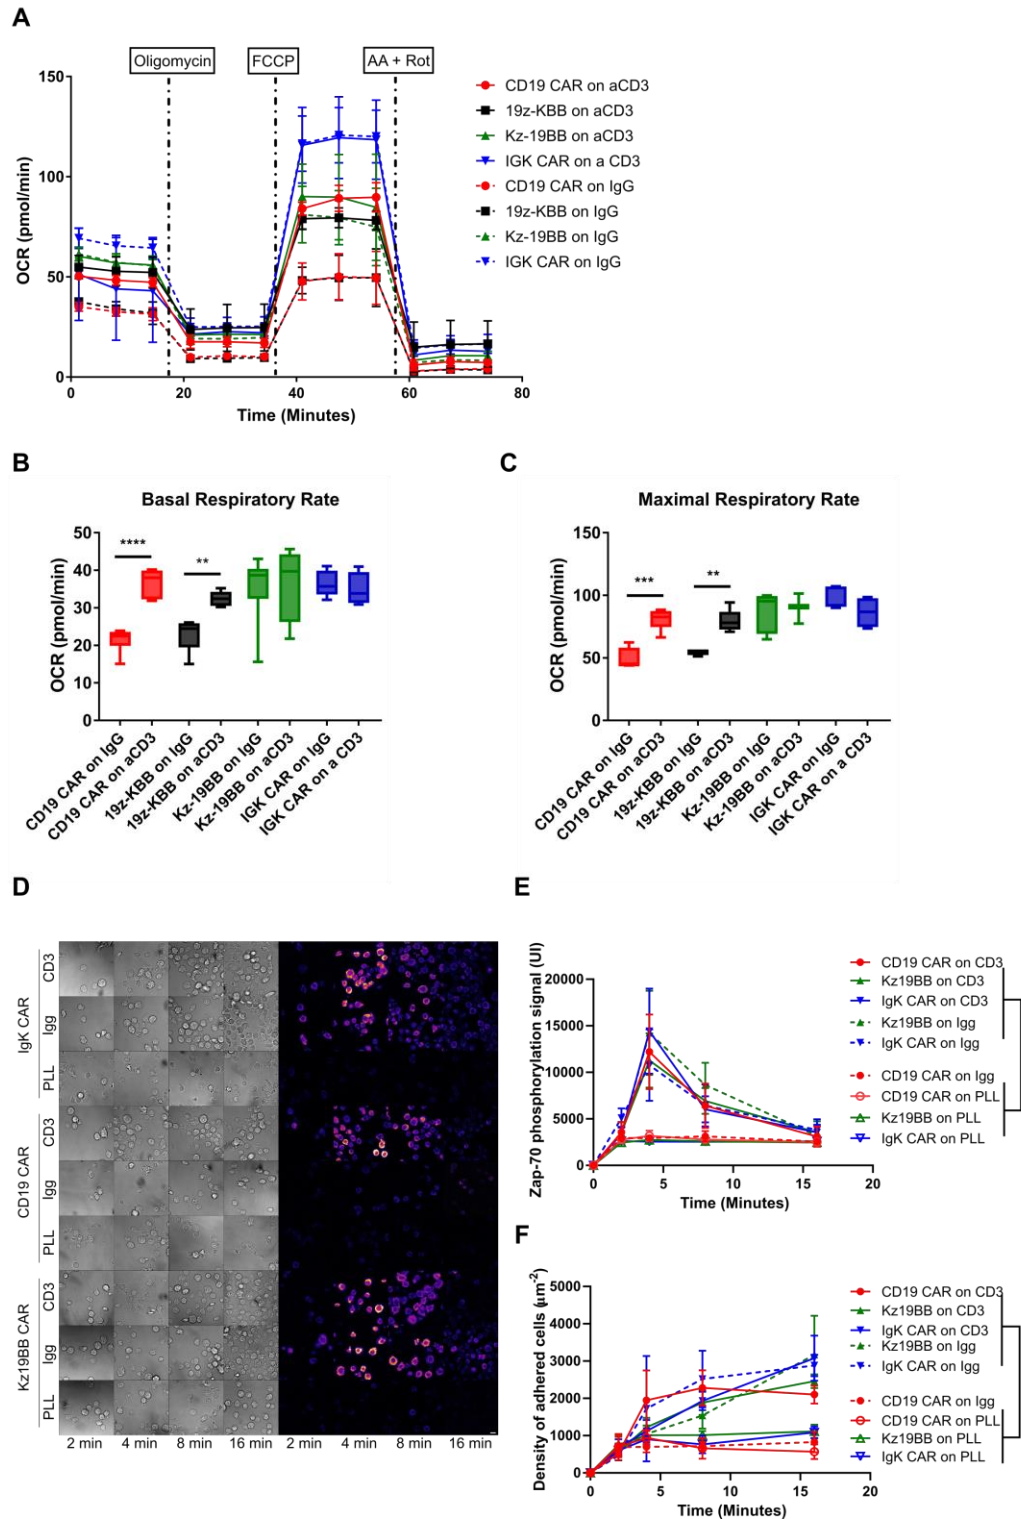

**Figure S5: Combinatorial CAR, Kz-19BB maintains IGK CAR properties and is activated in presence of IgG.** (A) Primary T cells transfected with CD19 CAR, 19z-KBB, Kz-19BB or IGK CAR coding mRNA were incubated on either anti-CD3 or serum purified IgG coated wells 18 hours after electroporation. Oxygen consumption rate (OCR) was assessed via a Seahorse assay. (B-C) Basal and maximal respiratory rates for each condition. Data represent mean  $\pm$  S.D. of hexaplicates. Significance

assessed by Student's t-test. (D) Kz-19BB, CD19 CAR or IGK CAR constructs electroporated T cells were incubated on anti-CD3, IgG or Poly-L-lysine (PLL) for 2, 4, 8 or 16 minutes. Cells were stained with anti-phospho-ZAP70-PE. Representative results for each time point acquired by confocal and corresponding bright field images are shown. Scale bar represents 5 $\mu$ m. (E) ZAP70 phosphorylation signal intensity as analyzed from micrographs. Significance between each construct's anti-CD3 and IgG response relative to their PLL response was assessed by two-way ANOVA with Tukey's correction (n = 50). (F) Surface adherence properties of each construct when in contact with anti-CD3 and IgG were assessed relative to their PLL response by mixed-effects model (REML). \*\* $P < 0.01$ , \*\*\* $P < 0.001$ , \*\*\*\* $P < 0.0001$ .

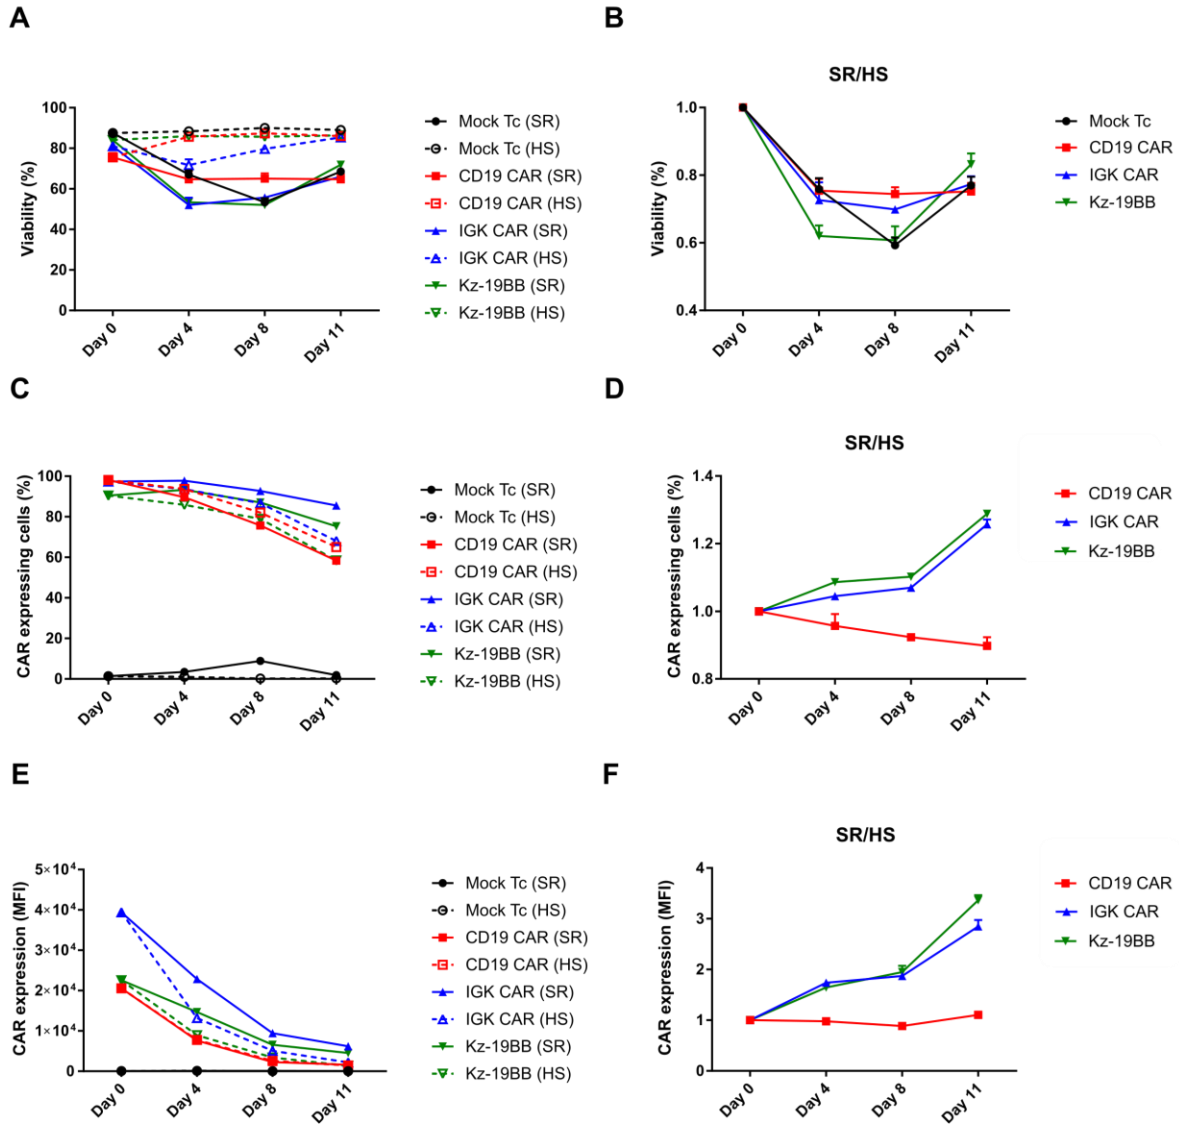

**Figure S6: Stable IGK and Kz-19BB CAR-expressing T cells downregulate CAR expression when expanded in human serum.** (A-F) Mock and CAR expressing T cells were expanded in either SR (serum replacement) or HS (human serum) containing X-VIVO-15 complete media for 11 days. Cell viability and other properties were evaluated on days 0, 4, 8 and 11. (A-B) Cell viability is monitored with a cell counter utilizing trypan blue exclusion. SR values are divided over HS values to observe the general trend between each expansion method. (C-F) CAR expressions were assessed as before and plotted either as percentage or mean fluorescent intensity (MFI). Similarly, SR values are divided over HS to observe a general trend. Data represent mean  $\pm$  S.D. of triplicates. Representative data from one of three experiments are shown.



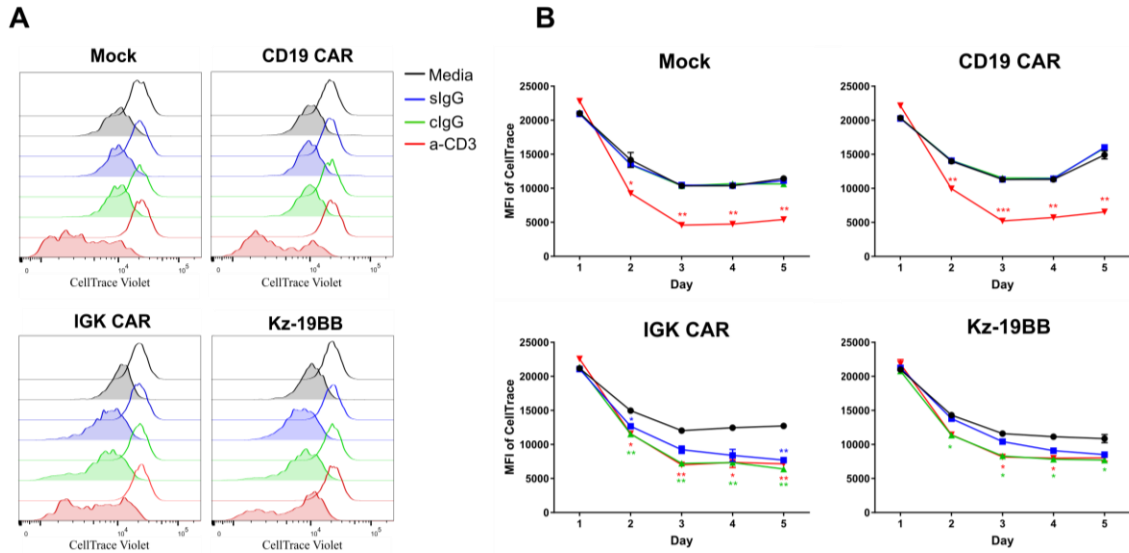

**Figure S7: IGK CAR and Kz-19BB mount a proliferative immune response to coated IgG as well as soluble.** (A) Mock or construct transduced T cells were cultured in the presence of media or sIgG or on anti-CD19 or IgG coated wells for 5 days. Prior to the experiment T cells were stained with CellTrace Violet and proliferation status was assessed every day through flow cytometry. Representative results show the difference between each group's Day 1 (line) and Day 5 (filled) status. (B) Proliferation assessment of each T cells group over the course of 5 days. Statistical test was performed between each group's media and other conditions by student's t-test. Data represent mean  $\pm$  S.D. of duplicates. \* $P < 0.05$ , \*\* $P < 0.01$ , \*\*\* $P < 0.001$ , \*\*\*\* $P < 0.0001$ .

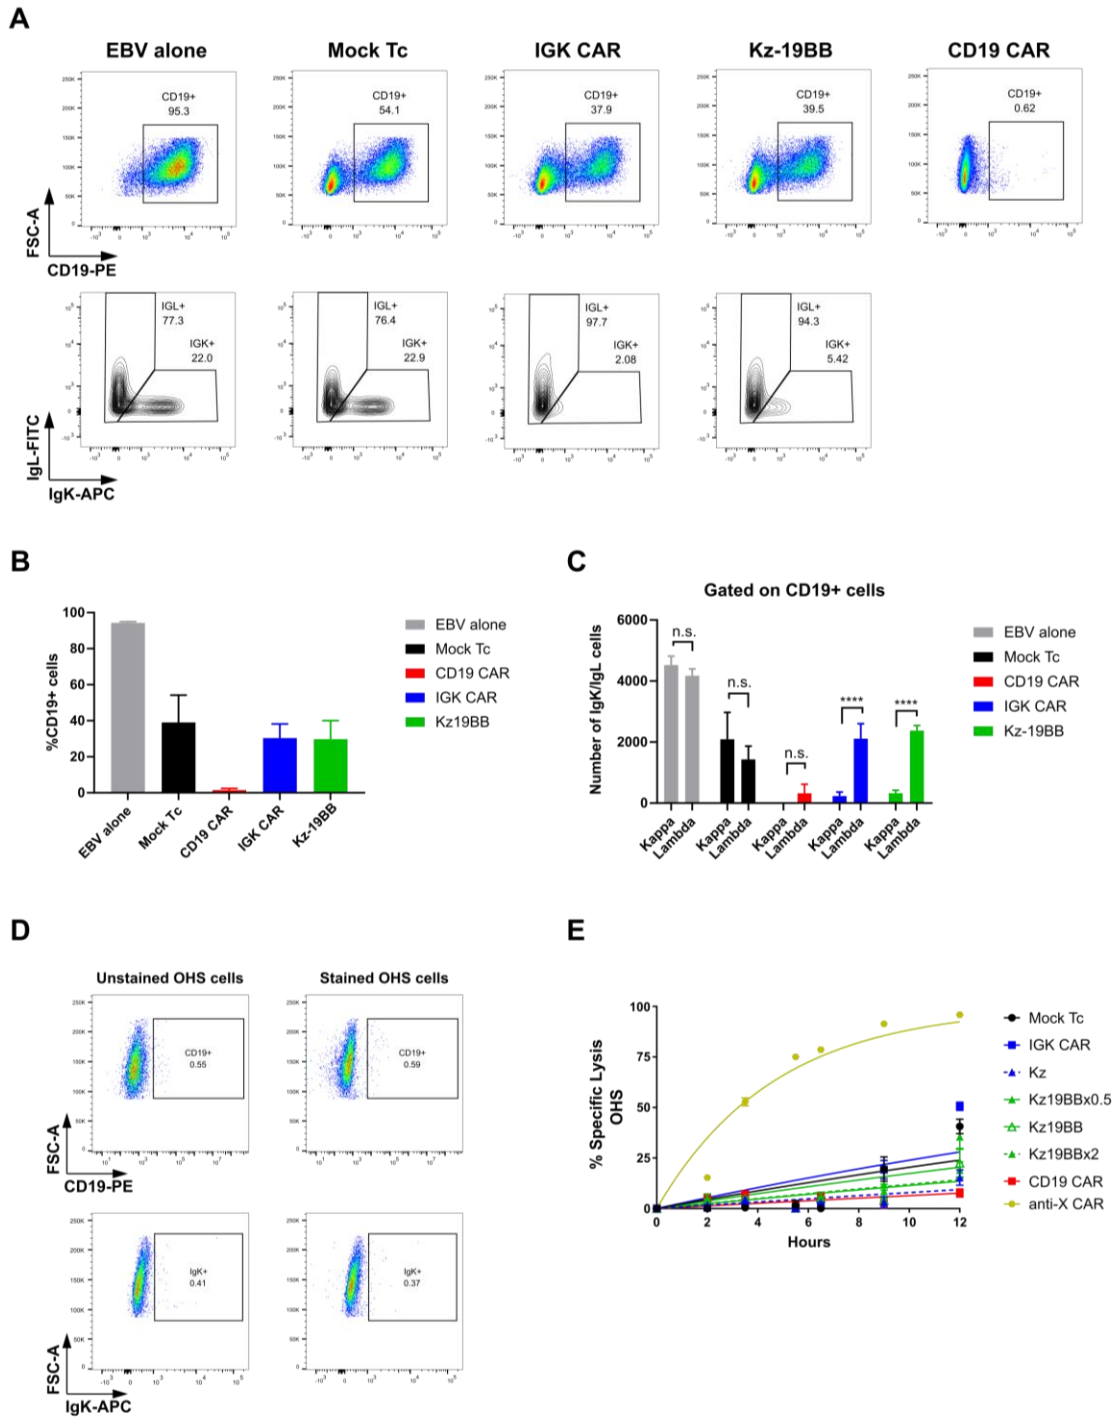

**Figure S8: Combinatorial CAR, Kz-19BB selectively eliminates Igκ+ EBV cells in a mixed environment.** (A-C) Retrovirally transduced T cells co-cultured for 12 hours with both BL-41 and Granta-519 target cell lines at a ratio of 2:1:1, respectively. After co-culture cells were stained with anti-CD19-PE, anti-Igκ APC and anti-Igλ-FITC. Data represent mean ± S.D. of quadruplicates. Representative data from one of three experiments are shown. Significance was assessed by Student t-test between kappa+ and lambda+ cell numbers. \* $P < 0.05$ , \*\* $P < 0.01$ , \*\*\* $P < 0.001$ , \*\*\*\* $P < 0.0001$ . (D) OHS cell line was stained with anti-CD19-PE and anti-Igκ APC. (E) BLI killing assay of Mock and CARs construct electroporated

primary T cells co-cultured with OHS cell line at an E:T ratio of 10:1 for 12 hours. Data represent mean  $\pm$  S.D. of triplicates. Representative data from one of two experiments are shown.
